# Supplementary material for: Lactose digestion and the evolutionary genetics of lactase persistence
Source: Springer Nature journal article supplement (doi:10.1007/s00439-008-0593-6), 2008-11-26
Supplement: MOESM6 [file 439_2008_593_MOESM6_ESM.pdf]

Supplementary table 3

| CONTINENT/REGION | COUNTRY      | POPULATION         | DESIGNATED COLLECTION LOCATION | LATITUDE | LONGITUDE | N CHROMOSOMES | -129107 FREQUENCY | CALCULATED PERSISTENCE FREQUENCY | REFERENCE                      | PRE-IMMORTATION |
|------------------|--------------|--------------------|--------------------------------|----------|-----------|---------------|-------------------|----------------------------------|--------------------------------|-----------------|
| AFRICA           | Algeria      | Berber Mzab        | Algiers                        | 36.76    | 3.05      | 66            | 0.17              | 0.31                             | Myles et al 2005               | yes             |
| AFRICA           | Algeria      | Mozabite           | Algiers                        | 36.76    | 3.05      | 60            | 0.22              | 0.39                             | Bersaglieri et al 2004         | yes             |
| AFRICA           | Cameroon     | Fulani             | Mayo Darle                     | 6.47     | 11.55     | 98            | 0.11              | 0.21                             | Mulcare et al 2004             | yes             |
| AFRICA           | Cameroon     | Fulani             | North and Extreme N            | 11.00    | 14.00     | 182           | 0.39              | 0.63                             | Ingram et al 2007, Ingram 2008 | yes             |
| AFRICA           | Cameroon     | Hausa              | Mayo Darle                     | 6.47     | 11.55     | 36            | 0.14              | 0.26                             | Mulcare et al 2004             | yes             |
| AFRICA           | Cameroon     | Mambila            | Atta                           | 6.45     | 11.28     | 244           | 0.00              | 0.01                             | Mulcare et al 2004             | yes             |
| AFRICA           | Cameroon     | Mambila            | Atta and Somie, Nor            | 9.00     | 13.00     | 74            | 0.00              | 0.00                             | Ingram 2008                    | yes             |
| AFRICA           | Cameroon     | Nso                | Kumbo                          | 6.20     | 10.67     | 252           | 0.00              | 0.00                             | Mulcare et al 2004             | yes             |
| AFRICA           | Cameroon     | Shuwa Arab         | nr Lake Chad                   | 13.00    | 14.00     | 30            | 0.00              | 0.00                             | Ingram 2008                    | yes             |
| AFRICA           | Cameroon     | Yamba              | Mayo Darle                     | 6.47     | 11.55     | 42            | 0.00              | 0.00                             | Mulcare et al 2004             | yes             |
| AFRICA           | Ethiopia     | Afar               | Assayita                       | 11.56    | 41.44     | 74            | 0.01              | 0.02                             | Ingram 2008                    | yes             |
| AFRICA           | Ethiopia     | Amharic            | Addis Ababa                    | 9.03     | 38.70     | 38            | 0.00              | 0.00                             | Ingram 2008                    | yes             |
| AFRICA           | Ethiopia     | Phenotyped Somali  | Dire Dawa                      | 9.58     | 41.87     | 218           | 0.02              | 0.04                             | Ingram 2008                    | yes             |
| AFRICA           | Ethiopia     | Somali             | Jijiga                         | 9.35     | 42.80     | 74            | 0.00              | 0.00                             | Ingram 2008                    | yes             |
| AFRICA           | Ethiopian    | Amharic            | Addis Ababa                    | 9.03     | 38.70     | 119           | 0.00              | 0.00                             | Mulcare 2006                   | yes             |
| AFRICA           | Ethiopian    | Anuak              | Gambella                       | 8.25     | 34.58     | 216           | 0.00              | 0.00                             | Mulcare et al 2004             | yes             |
| AFRICA           | Ethiopian    | Nuer               | Gambella                       | 8.25     | 34.58     | 238           | 0.00              | 0.00                             | Mulcare et al 2004             | yes             |
| AFRICA           | Kenya        | Burji              | Central                        | 1.00     | 38.00     | 16            | 0.00              | 0.00                             | Tishkoff et al 2007            | yes             |
| AFRICA           | Kenya        | Kikuyu             | Central                        | 1.00     | 38.00     | 4             | 0.00              | 0.00                             | Tishkoff et al 2007            | yes             |
| AFRICA           | Kenya        | Maasai             | Central                        | 1.00     | 38.00     | 64            | 0.00              | 0.00                             | Tishkoff et al 2007            | yes             |
| AFRICA           | Kenya        | Marakwet           | Central                        | 1.00     | 38.00     | 14            | 0.00              | 0.00                             | Tishkoff et al 2007            | yes             |
| AFRICA           | Kenya        | Nandi              | Central                        | 1.00     | 38.00     | 8             | 0.00              | 0.00                             | Tishkoff et al 2007            | yes             |
| AFRICA           | Kenya        | Ogiek              | Central                        | 1.00     | 38.00     | 22            | 0.00              | 0.00                             | Tishkoff et al 2007            | yes             |
| AFRICA           | Kenya        | Pikot              | Central                        | 1.00     | 38.00     | 28            | 0.00              | 0.00                             | Tishkoff et al 2007            | yes             |
| AFRICA           | Kenya        | Sabaot             | Central                        | 1.00     | 38.00     | 12            | 0.00              | 0.00                             | Tishkoff et al 2007            | yes             |
| AFRICA           | Kenya        | Samburu            | Central                        | 1.00     | 38.00     | 18            | 0.00              | 0.00                             | Tishkoff et al 2007            | yes             |
| AFRICA           | Kenya        | Sengwer            | Central                        | 1.00     | 38.00     | 32            | 0.00              | 0.00                             | Tishkoff et al 2007            | yes             |
| AFRICA           | Kenya        | Tugen              | Central                        | 1.00     | 38.00     | 32            | 0.00              | 0.00                             | Tishkoff et al 2007            | yes             |
| AFRICA           | Kenya        | Turkana            | Central                        | 1.00     | 38.00     | 26            | 0.00              | 0.00                             | Tishkoff et al 2007            | yes             |
| AFRICA           | Malawi       | Bantu              | Lilongwe                       | -13.98   | 33.78     | 410           | 0.00              | 0.00                             | Mulcare et al 2004             | yes             |
| AFRICA           | Morocco      | Arabs              | Central                        | 34.03    | -6.84     | 180           | 0.18              | 0.33                             | Enattah et al 2007             | yes             |
| AFRICA           | Morocco      | Berber             | Ifrane                         | 34.05    | -3.77     | 154           | 0.14              | 0.25                             | Mulcare et al 2004             | yes             |
| AFRICA           | Morocco      | Saharawi           | Central                        | 34.03    | -6.84     | 114           | 0.26              | 0.45                             | Enattah et al 2007             | yes             |
| AFRICA           | Morocco      | Saharawi*          | Central                        | 34.03    | -6.84     | 22            | 0.23              | 0.41                             | Enattah et al 2008             | duplicate       |
| AFRICA           | Morocco      |                    | Central                        | 34.03    | -6.84     | 24            | 0.21              | 0.38                             | Enattah et al 2008             | yes             |
| AFRICA           | Morocco      | Amizmiz            | (High-Atlas)                   | 34.00    | -4.00     | 78            | 0.14              | 0.26                             | Myles et al 2005               | yes             |
| AFRICA           | Morocco      | Berber Moyen-Atlas | (Mid-Atlas)                    | 32.00    | -6.00     | 66            | 0.16              | 0.29                             | Myles et al 2005               | yes             |
| AFRICA           | N. E. Kenya  | Bantu              | Nairobi                        | -1.00    | 36.00     | 24            | 0.00              | 0.00                             | Bersaglieri et al 2004         | yes             |
| AFRICA           | Namibia      | San                | Windhoek                       | -22.57   | 17.08     | 30            | 0.00              | 0.00                             | Mulcare 2006                   | yes             |
| AFRICA           | Namibia      | San                | Windhoek                       | -22.57   | 17.08     | 14            | 0.00              | 0.00                             | Bersaglieri et al 2004         | yes             |
| AFRICA           | Nigeria      | Yoruba             | Ibadan                         | 7.23     | 3.47      | 50            | 0.00              | 0.00                             | Bersaglieri et al 2004         | yes             |
| AFRICA           | Senegal      | Manjak             | Southwest                      | 14.00    | -16.00    | 186           | 0.00              | 0.00                             | Mulcare et al 2004             | yes             |
| AFRICA           | Senegal      | Wolof              | Dakar                          | 14.67    | -17.38    | 118           | 0.00              | 0.00                             | Ingram 2008                    | yes             |
| AFRICA           | Senegal      | Wolof              | West                           | 14.00    | -17.00    | 138           | 0.00              | 0.00                             | Mulcare et al 2004             | yes             |
| AFRICA           | Somalia      | Somali             | Mogadishu                      | 2.07     | 45.37     | 158           | 0.03              | 0.06                             | Enattah et al 2007             | yes             |
| AFRICA           | South Africa | Bantu              | Johannesburg                   | -26.20   | 28.08     | 50            | 0.00              | 0.00                             | Mulcare 2006                   | yes             |
| AFRICA           | South Africa | Bantu              | Johannesburg                   | -26.20   | 28.08     | 16            | 0.00              | 0.00                             | Bersaglieri et al 2004         | yes             |
| AFRICA           | Sudan        | Ama                | North Sudan                    | 20.00    | 30.00     | 4             | 0.00              | 0.00                             | Tishkoff et al 2007            | yes             |
| AFRICA           | Sudan        | Beja (Banuamir)    | North Sudan                    | 20.00    | 30.00     | 12            | 0.00              | 0.00                             | Tishkoff et al 2007            | yes             |
| AFRICA           | Sudan        | Beja (Hadandawa)   | North Sudan                    | 20.00    | 30.00     | 22            | 0.00              | 0.00                             | Tishkoff et al 2007            | yes             |
| AFRICA           | Sudan        | Beni Amer          | Port Sudan                     | 19.62    | 37.22     | 200           | 0.05              | 0.10                             | Ingram 2007 2008               | yes             |
| AFRICA           | Sudan        | Dinka              | North Sudan                    | 20.00    | 30.00     | 18            | 0.00              | 0.00                             | Tishkoff et al 2007            | yes             |
| AFRICA           | Sudan        | Dunglawi           | North Sudan                    | 20.00    | 30.00     | 12            | 0.00              | 0.00                             | Ingram 2008                    | yes             |
| AFRICA           | Sudan        | Fulani             | North Sudan                    | 20.00    | 30.00     | 88            | 0.48              | 0.73                             | Enattah et al 2007             | yes             |
| AFRICA           | Sudan        | Gaali              | Khartoum                       | 15.59    | 32.53     | 20            | 0.00              | 0.00                             | Enattah et al 2008             | yes             |
| AFRICA           | Sudan        | Jaali              | Shendi                         | 16.69    | 33.43     | 192           | 0.05              | 0.10                             | Ingram et al 2007, Ingram 2008 | yes             |
| AFRICA           | Sudan        | Koalib             | North Sudan                    | 20.00    | 30.00     | 2             | 0.00              | 0.00                             | Tishkoff et al 2007            | yes             |
| AFRICA           | Sudan        | Liguri/Logorik     | North Sudan                    | 20.00    | 30.00     | 2             | 0.00              | 0.00                             | Tishkoff et al 2007            | yes             |
| AFRICA           | Sudan        | Mahas              | Khartoum                       | 15.59    | 32.53     | 30            | 0.00              | 0.00                             | Enattah et al 2008             | yes             |
| AFRICA           | Sudan        | Masalit            | North Sudan                    | 20.00    | 30.00     | 2             | 0.00              | 0.00                             | Tishkoff et al 2007            | yes             |
| AFRICA           | Sudan        | Nuer               | North Sudan                    | 20.00    | 30.00     | 10            | 0.00              | 0.00                             | Tishkoff et al 2007            | yes             |
| AFRICA           | Sudan        | Shaigi             | North Sudan                    | 20.00    | 30.00     | 18            | 0.00              | 0.00                             | Ingram 2008                    | yes             |
| AFRICA           | Sudan        | Shilook            | North Sudan                    | 20.00    | 30.00     | 16            | 0.00              | 0.00                             | Tishkoff et al 2007            | yes             |
| AFRICA           | Sudanese     | Dinka              | South                          | 4.00     | 31.00     | 68            | 0.00              | 0.00                             | Mulcare et al 2004             | yes             |
| AFRICA           | Sudanese     | Ga'ali             | North                          | 20.00    | 30.00     | 60            | 0.00              | 0.00                             | Mulcare et al 2004             | yes             |
| AFRICA           | Sudanese     | Nuer               | South                          | 4.00     | 31.00     | 26            | 0.00              | 0.00                             | Mulcare et al 2004             | yes             |
| AFRICA           | Sudanese     | Shaigi             | North                          | 20.00    | 30.00     | 22            | 0.00              | 0.00                             | Mulcare et al 2004             | yes             |
| AFRICA           | Tanzania     | Akie               | Central                        | -5.00    | 35.00     | 28            | 0.00              | 0.00                             | Tishkoff et al 2007            | yes             |
| AFRICA           | Tanzania     | Burunge            | Central                        | -5.00    | 35.00     | 36            | 0.00              | 0.00                             | Tishkoff et al 2007            | yes             |
| AFRICA           | Tanzania     | Datog              | Central                        | -5.00    | 35.00     | 8             | 0.00              | 0.00                             | Tishkoff et al 2007            | yes             |
| AFRICA           | Tanzania     | Dorobo             | Central                        | -5.00    | 35.00     | 20            | 0.00              | 0.00                             | Tishkoff et al 2007            | yes             |
| AFRICA           | Tanzania     | Fiome              | Central                        | -5.00    | 35.00     | 24            | 0.00              | 0.00                             | Tishkoff et al 2007            | yes             |
| AFRICA           | Tanzania     | Hadza              | Central                        | -5.00    | 35.00     | 36            | 0.00              | 0.00                             | Tishkoff et al 2007            | yes             |
| AFRICA           | Tanzania     | Iraqw              | Central                        | -5.00    | 35.00     | 78            | 0.00              | 0.00                             | Tishkoff et al 2007            | yes             |
| AFRICA           | Tanzania     | Maasai             | Central                        | -5.00    | 35.00     | 38            | 0.00              | 0.00                             | Tishkoff et al 2007            | yes             |
| AFRICA           | Tanzania     | Mbugu              | Central                        | -5.00    | 35.00     | 60            | 0.00              | 0.00                             | Tishkoff et al 2007            | yes             |
| AFRICA           | Tanzania     | Mbugwe             | Central                        | -5.00    | 35.00     | 26            | 0.00              | 0.00                             | Tishkoff et al 2007            | yes             |
| AFRICA           | Tanzania     | Pare               | Central                        | -5.00    | 35.00     | 20            | 0.00              | 0.00                             | Tishkoff et al 2007            | yes             |
| AFRICA           | Tanzania     | Rangi              | Central                        | -5.00    | 35.00     | 70            | 0.00              | 0.00                             | Tishkoff et al 2007            | yes             |
| AFRICA           | Tanzania     | Samba'a            | Central                        | -5.00    | 35.00     | 6             | 0.00              | 0.00                             | Tishkoff et al 2007            | yes             |
| AFRICA           | Tanzania     | Sandawe            | Central                        | -5.00    | 35.00     | 62            | 0.00              | 0.00                             | Tishkoff et al 2007            | yes             |
| AFRICA           | Uganda       | Bantu              | Sese Islands                   | 0.43     | 32.98     | 44            | 0.00              | 0.00                             | Mulcare et al 2004             | yes             |
| AMERICAS         | Brazil       | Karitiaiana        | Brasilia                       | -15.78   | -47.92    | 48            | 0.00              | 0.00                             | Bersaglieri et al 2004         | yes             |
| AMERICAS         | Brazil       | Surui              | Brasilia                       | -15.78   | -47.92    | 42            | 0.00              | 0.00                             | Bersaglieri et al 2004         | yes             |
| AMERICAS         | Colombia     | Colombian          | Bogota                         | 4.60     | -74.08    | 26            | 0.00              | 0.00                             | Bersaglieri et al 2004         | yes             |
| AMERICAS         | Mexican      | Pima               | Mexico City                    | 19.43    | -99.14    | 50            | 0.00              | 0.00                             | Bersaglieri et al 2004         | yes             |
| AMERICAS         | Mexico       | Maya               | Mexico City                    | 19.43    | -99.14    | 50            | 0.02              | 0.04                             | Bersaglieri et al 2004         | yes             |
| AMERICAS         | USA          | African Americans  | Central                        | 40.00    | -100.00   | 100           | 0.09              | 0.17                             | Enattah et al 2007             | no              |
| AMERICAS         | Utah         | Europeans          | Salt Lake City                 | 40.76    | -111.89   | 184           | 0.74              | 0.93                             | Enattah et al 2007             | no              |
| ASIA             | Afghanistan  | Pashtu (Pushu)     | Murdock 1967                   | 35.00    | 72.00     | 16            | 0.13              | 0.23                             | Mulcare 2006                   | yes             |
| ASIA             | Afghanistan  | Tadjik             | Baghlan                        | 36.13    | 68.71     | 98            | 0.10              | 0.19                             | Mulcare 2006                   | yes             |
| ASIA             | Afghanistan  | Uzbek              | Meymaneh                       | 35.50    | 67.64     | 76            | 0.08              | 0.15                             | Mulcare 2006                   | yes             |
| ASIA             | Algeria      | Algerian           | Tlemcen                        | 34.88    | -1.32     | 21            | 0.33              | 0.56                             | Mulcare 2006                   | yes             |
| ASIA             | Armenia      | Armenian           | Yerevan                        | 40.18    | 44.51     | 88            | 0.01              | 0.02                             | Mulcare 2006                   | yes             |
| ASIA             | Azerbaijan   | Azerbaijani        | Baku                           | 40.40    | 49.88     | 44            | 0.02              | 0.04                             | Mulcare 2006                   | yes             |
| ASIA             | Cambodia     | Cambodian          | Phnom Penh                     | 11.55    | 104.92    | 22            | 0.00              | 0.00                             | Bersaglieri et al 2004         | yes             |
| ASIA             | China        | Dai                | Beijing                        | 39.93    | 116.39    | 20            | 0.00              | 0.00                             | Bersaglieri et al 2004         | yes             |
| ASIA             | China        | Daur               | Beijing                        | 39.93    | 116.39    | 20            | 0.00              | 0.00                             | Bersaglieri et al 2004         | yes             |
| ASIA             | China        | Han                | Murdock 1967                   | 19.00    | 109.00    | 90            | 0.00              | 0.00                             | Bersaglieri et al 2004         | yes             |
| ASIA             | China        | Han                | central                        | 35.00    | 100.00    | 200           | 0.00              | 0.00                             | Enattah et al 2007             | yes             |
| ASIA             | China        | Hezhen             | Beijing                        | 39.93    | 116.39    | 20            | 0.00              | 0.00                             | Bersaglieri et al 2004         | yes             |
| ASIA             | China        | Lahu               | Beijing                        | 39.93    | 116.39    | 20            | 0.00              | 0.00                             | Bersaglieri et al 2004         | yes             |
| ASIA             | China        | Miaozu             | Murdock 1967                   | 26.00    | 107.00    | 20            | 0.00              | 0.00                             | Bersaglieri et al 2004         | yes             |
| ASIA             | China        | Mongola            | Beijing                        | 39.93    | 116.39    | 20            | 0.10              | 0.19                             | Bersaglieri et al 2004         | yes             |
| ASIA             | China        | Naxi               | Beijing                        | 39.93    | 116.39    | 20            | 0.00              | 0.00                             | Bersaglieri et al 2004         | yes             |
| ASIA             | China        | Oroqen             | Beijing                        | 39.93    | 116.39    | 20            | 0.00              | 0.00                             | Bersaglieri et al 2004         | yes             |
| ASIA             | China        | She                | Beijing                        | 39.93    | 116.39    | 20            | 0.00              | 0.00                             | Bersaglieri et al 2004         | yes             |
| ASIA             | China        | Tu                 | Beijing                        | 39.93    | 116.39    | 20            | 0.00              | 0.00                             | Bersaglieri et al 2004         | yes             |
| ASIA             | China        | Tujia              | Beijing                        | 39.93    | 116.39    | 20            | 0.00              | 0.00                             | Bersaglieri et al 2004         | yes             |
| ASIA             | China        | Uygur              | Beijing                        | 39.93    | 116.39    | 20            | 0.05              | 0.10                             | Bersaglieri et al 2004         | yes             |
| ASIA             | China        | Xibo               | Beijing                        | 39.93    | 116.39    | 18            | 0.00              | 0.00                             | Bersaglieri et al 2004         | yes             |

|                  |                                 |                     |                       |       |        |      |      |      |                                |           |
|------------------|---------------------------------|---------------------|-----------------------|-------|--------|------|------|------|--------------------------------|-----------|
| ASIA             | China                           | Yizu                | Beijing               | 39.93 | 116.39 | 20   | 0.00 | 0.00 | Bersaglieri et al 2004         | yes       |
| ASIA             | India                           | Indian              | Chennai               | 13.08 | 80.28  | 68   | 0.13 | 0.25 | Mulcare 2006                   | yes       |
| ASIA             | North India                     | Indian              | New Delhi             | 28.60 | 77.20  | 128  | 0.19 | 0.34 | Mulcare 2006                   | yes       |
| ASIA             | Russia                          | Erzas               | Saransk               | 54.11 | 45.11  | 60   | 0.27 | 0.47 | Enattah et al 2007             | yes       |
| ASIA             | Russia                          | Mokshas             | Saransk               | 54.11 | 45.11  | 60   | 0.28 | 0.48 | Enattah et al 2007             | yes       |
| ASIA             | Russia                          | Ob-Ugric            | Central               | 60.00 | 80.00  | 40   | 0.03 | 0.06 | Enattah et al 2007             | yes       |
| ASIA             | Russia                          | Udmurts             | Central               | 60.00 | 80.00  | 60   | 0.33 | 0.55 | Enattah et al 2007             | yes       |
| ASIA             | Russia (Komi republ             | Komi                | Syslyvkar             | 61.40 | 59.49  | 20   | 0.15 | 0.28 | Enattah et al 2007             | yes       |
| ASIA             | Siberia                         | Yakut               | Murdock 1967          | 65.00 | 125.00 | 50   | 0.08 | 0.12 | Bersaglieri et al 2004         | yes       |
| ASIA             | South Korea                     | ?                   | Seoul                 | 35.57 | 127.00 | 46   | 0.00 | 0.00 | Enattah et al 2007             | yes       |
| AUSTRALASIA      | Papua New Guinea                | Papuan              | Port Moresby          | -9.46 | 147.19 | 34   | 0.00 | 0.00 | Bersaglieri et al 2004         | yes       |
| AUSTRALASIA      | Solomon Islands                 | Melanesian (NAN)    | Honiara               | -9.43 | 159.95 | 44   | 0.00 | 0.00 | Bersaglieri et al 2004         | yes       |
| EUROPE           | Czechoslovakia                  | Roma                | Prague                | 50.08 | 14.47  | 162  | 0.10 | 0.19 | Mulcare 2006                   | yes       |
| EUROPE           | Finland                         | Finns*              | central               | 65.00 | 28.00  | 1876 | 0.58 | 0.82 | Enattah et al 2008             | yes       |
| EUROPE           | Finland                         | Saami               | v far north Finland s | 69.00 | 29.00  | 60   | 0.17 | 0.31 | Enattah et al 2007             | yes       |
| EUROPE           | Finland and Sweden              | Scandinavians       | Stockholm             | 59.33 | 18.05  | 360  | 0.82 | 0.97 | Bersaglieri et al 2004         | yes       |
| EUROPE           | Finns                           | eastern             |                       | 65.00 | 29.00  | 77   | 0.55 | 0.80 | Enattah et al 2007             | yes       |
| EUROPE           | Finns                           | western             |                       | 65.00 | 26.00  | 308  | 0.62 | 0.86 | Enattah et al 2007             | yes       |
| EUROPE           | France                          | Basques             | Pyrennees             | 43.50 | 0.00   | 170  | 0.66 | 0.88 | Enattah et al 2007             | yes       |
| EUROPE           | France                          | French              | Paris                 | 48.87 | 2.33   | 58   | 0.43 | 0.68 | Bersaglieri et al 2004         | yes       |
| EUROPE           | France                          | French              | Paris                 | 48.87 | 2.33   | 34   | 0.34 | 0.56 | Enattah et al 2007             | yes       |
| EUROPE           | France                          | French Basque       | Bayonne               | 43.00 | -1.00  | 48   | 0.67 | 0.89 | Bersaglieri et al 2004         | yes       |
| EUROPE           | Germany                         | German              | Hamburg               | 53.55 | 10.00  | 60   | 0.56 | 0.80 | Mulcare 2006                   | yes       |
| EUROPE           | Greeks                          | Greece              | Athens                | 37.98 | 23.73  | 82   | 0.13 | 0.25 | Mulcare 2006                   | yes       |
| EUROPE           | Italy                           | North Italian       | Bergamo               | 45.68 | 9.72   | 28   | 0.36 | 0.59 | Bersaglieri et al 2004         | yes       |
| EUROPE           | Italy                           | S. European*        | Rome                  | 41.90 | 12.48  | 66   | 0.09 | 0.17 | Ingram 2008                    | yes       |
| EUROPE           | Italy                           | Sardinian           | Cagliari              | 39.22 | 9.12   | 56   | 0.07 | 0.14 | Bersaglieri et al 2004         | yes       |
| EUROPE           | Italy                           | South Italians      | Southern              | 39.30 | 16.25  | 200  | 0.05 | 0.10 | Enattah et al 2007             | yes       |
| EUROPE           | Italy                           | Tuscan              | Florence              | 43.77 | 11.25  | 16   | 0.06 | 0.12 | Bersaglieri et al 2004         | yes       |
| EUROPE           | Poland                          | Ashkenazi           | Warsaw                | 52.25 | 21.00  | 96   | 0.08 | 0.16 | Mulcare 2006                   | yes       |
| EUROPE           | Russia                          | Russian             | Moscow                | 55.75 | 37.62  | 50   | 0.24 | 0.42 | Bersaglieri et al 2004         | yes       |
| EUROPE           | Russian (Caucasus)              | Adygei              | Cherkessk             | 44.22 | 42.06  | 34   | 0.12 | 0.22 | Bersaglieri et al 2004         | yes       |
| EUROPE           | Sweden                          | Swedish             | Huddinge              | 59.23 | 17.98  | 784  | 0.74 | 0.93 | Almon et al 2007               | yes       |
| EUROPE           | UK                              | English, London     | London                | 51.50 | -0.12  | 64   | 0.73 | 0.93 | Mulcare 2006                   | yes       |
| EUROPE           | UK                              | N. European*        | Central               | 54.00 | -2.00  | 110  | 0.62 | 0.86 | Ingram 2008                    | yes       |
| EUROPE           | UK                              | Northern Ireland    | Enniskillen           | 54.37 | -7.63  | 65   | 0.95 | 1.00 | Mulcare 2006                   | yes       |
| EUROPE           | UK                              | Orkadian (Orkney is | Stromness             | 58.95 | -3.30  | 32   | 0.69 | 0.90 | Bersaglieri et al 2004         | yes       |
| EUROPE/ASIA      | Russia                          | Druss               | Buynausk              | 42.83 | 47.12  | 34   | 0.12 | 0.23 | Enattah et al 2007             | yes       |
| EUROPE/ASIA      | Russia                          | mixed               | Buynausk              | 42.83 | 47.12  | 46   | 0.13 | 0.24 | Enattah et al 2007             | yes       |
| EUROPE/ASIA      | Russia                          | Nog                 | Buynausk              | 42.83 | 47.12  | 40   | 0.07 | 0.14 | Enattah et al 2007             | yes       |
| NEAR/MIDDLE EAST | Iran                            | Iranian             | Murdock 1967          | 36.00 | 52.00  | 90   | 0.04 | 0.09 | Mulcare 2006                   | yes       |
| NEAR/MIDDLE EAST | Iran                            | Iranian             | Teheran               | 35.67 | 51.42  | 42   | 0.10 | 0.19 | Enattah et al 2007             | yes       |
| NEAR/MIDDLE EAST | Iran                            | Iranians*           | Teheran               | 35.67 | 51.42  | 42   | 0.10 | 0.19 | Enattah et al 2008             | yes       |
| NEAR/MIDDLE EAST | Iran                            | Oashqai             | Teheran               | 35.67 | 51.42  | 20   | 0.05 | 0.10 | Enattah et al 2007             | yes       |
| NEAR/MIDDLE EAST | Israel                          | Bedouin             | Negev (HaNegev)       | 31.00 | 34.00  | 98   | 0.03 | 0.06 | Bersaglieri et al 2004         | yes       |
| NEAR/MIDDLE EAST | Israel                          | Druze               | Carmel                | 33.00 | 35.00  | 96   | 0.02 | 0.04 | Bersaglieri et al 2004         | yes       |
| NEAR/MIDDLE EAST | Israel                          | Druze               | Tel Aviv              | 32.07 | 34.77  | 28   | 0.04 | 0.08 | Ingram 2008                    | yes       |
| NEAR/MIDDLE EAST | Israel                          | Israeli Arab        | Tel Aviv              | 32.07 | 34.77  | 160  | 0.00 | 0.00 | Ingram 2008                    | yes       |
| NEAR/MIDDLE EAST | Israel                          | Israeli Bedouin     | Murdock 1967          | 33.00 | 37.00  | 26   | 0.00 | 0.00 | Mulcare 2006                   | yes       |
| NEAR/MIDDLE EAST | Israel                          | Israeli Bedouin     | Tel Aviv              | 32.07 | 34.77  | 38   | 0.03 | 0.06 | Ingram 2008                    | yes       |
| NEAR/MIDDLE EAST | Israel                          | Palestinian         | Jerusalem             | 31.47 | 35.13  | 102  | 0.04 | 0.08 | Bersaglieri et al 2004         | yes       |
| NEAR/MIDDLE EAST | Israel/PAA                      | Palestinian Arab    | ?                     | 31.90 | 35.20  | 38   | 0.00 | 0.00 | Ingram et al 2007, Ingram 2008 | yes       |
| NEAR/MIDDLE EAST | Israeli Arabs                   | Israel              | Murdock 1967          | 32.00 | 35.00  | 36   | 0.00 | 0.00 | Mulcare 2006                   | yes       |
| NEAR/MIDDLE EAST | Japan                           | Japanese            | Tokyo                 | 35.69 | 139.75 | 62   | 0.00 | 0.00 | Bersaglieri et al 2004         | yes       |
| NEAR/MIDDLE EAST | Jordan                          | Jordanian Bedouin   | Amman                 | 31.95 | 35.93  | 40   | 0.08 | 0.14 | Mulcare 2006                   | yes       |
| NEAR/MIDDLE EAST | Jordan                          | Jordanian Bedouin   | Amman                 | 31.95 | 35.93  | 52   | 0.00 | 0.00 | Ingram et al 2007, Ingram 2008 | yes       |
| NEAR/MIDDLE EAST | Jordan                          |                     | Amman                 | 31.95 | 35.93  | 112  | 0.05 | 0.10 | Enattah et al 2008             | yes       |
| NEAR/MIDDLE EAST | Kuwait                          | Kuwaiti             | Kuwait                | 29.37 | 47.98  | 28   | 0.00 | 0.00 | Mulcare 2006                   | yes       |
| NEAR/MIDDLE EAST | Pakistan                        | Balochi             | Islamabad             | 33.43 | 73.04  | 50   | 0.36 | 0.59 | Bersaglieri et al 2004         | yes       |
| NEAR/MIDDLE EAST | Pakistan                        | Balti               | Central               | 30.00 | 68.00  | 46   | 0.00 | 0.00 | Enattah et al 2007             | yes       |
| NEAR/MIDDLE EAST | Pakistan                        | Baluch              | Central               | 30.00 | 68.00  | 38   | 0.34 | 0.56 | Enattah et al 2007             | yes       |
| NEAR/MIDDLE EAST | Pakistan                        | Brahui              | Islamabad             | 33.43 | 73.04  | 50   | 0.34 | 0.56 | Bersaglieri et al 2004         | yes       |
| NEAR/MIDDLE EAST | Pakistan                        | Brahui              | Central               | 30.00 | 68.00  | 60   | 0.27 | 0.47 | Enattah et al 2007             | yes       |
| NEAR/MIDDLE EAST | Pakistan                        | Burusho             | Murdock 1967          | 37.00 | 72.00  | 50   | 0.10 | 0.19 | Bersaglieri et al 2004         | yes       |
| NEAR/MIDDLE EAST | Pakistan                        | Burusho             | Central               | 30.00 | 68.00  | 60   | 0.02 | 0.04 | Enattah et al 2007             | yes       |
| NEAR/MIDDLE EAST | Pakistan                        | Hazara              | Murdock 1967          | 35.00 | 66.00  | 50   | 0.08 | 0.15 | Bersaglieri et al 2004         | yes       |
| NEAR/MIDDLE EAST | Pakistan                        | Hazara              | Central               | 30.00 | 68.00  | 28   | 0.04 | 0.08 | Enattah et al 2007             | yes       |
| NEAR/MIDDLE EAST | Pakistan                        | Kalash              | Islamabad             | 33.43 | 73.04  | 50   | 0.00 | 0.00 | Bersaglieri et al 2004         | yes       |
| NEAR/MIDDLE EAST | Pakistan                        | Kalash              | Central               | 30.00 | 68.00  | 60   | 0.00 | 0.00 | Enattah et al 2007             | yes       |
| NEAR/MIDDLE EAST | Pakistan                        | Kashmiri            | Central               | 30.00 | 68.00  | 40   | 0.12 | 0.23 | Enattah et al 2007             | yes       |
| NEAR/MIDDLE EAST | Pakistan                        | Makrani             | Islamabad             | 33.43 | 73.04  | 50   | 0.34 | 0.56 | Bersaglieri et al 2004         | yes       |
| NEAR/MIDDLE EAST | Pakistan                        | Makrani Baluch      | Central               | 30.00 | 68.00  | 58   | 0.17 | 0.31 | Enattah et al 2007             | yes       |
| NEAR/MIDDLE EAST | Pakistan                        | Mohannes            | Central               | 30.00 | 68.00  | 58   | 0.28 | 0.48 | Enattah et al 2007             | yes       |
| NEAR/MIDDLE EAST | Pakistan                        | Parsi               | Central               | 30.00 | 68.00  | 58   | 0.14 | 0.26 | Enattah et al 2007             | yes       |
| NEAR/MIDDLE EAST | Pakistan                        | Pathan              | Murdock 1967          | 35.00 | 72.00  | 50   | 0.30 | 0.51 | Bersaglieri et al 2004         | yes       |
| NEAR/MIDDLE EAST | Pakistan                        | Pathan              | Central               | 30.00 | 68.00  | 56   | 0.30 | 0.51 | Enattah et al 2007             | yes       |
| NEAR/MIDDLE EAST | Pakistan                        | Sindi               | Murdock 1967          | 25.00 | 68.00  | 50   | 0.32 | 0.54 | Bersaglieri et al 2004         | yes       |
| NEAR/MIDDLE EAST | Pakistan                        | Sindi               | Central               | 30.00 | 68.00  | 56   | 0.41 | 0.65 | Enattah et al 2007             | yes       |
| NEAR/MIDDLE EAST | Palestinian Arabs               | Palestine           | Murdock 1967          | 32.00 | 35.00  | 34   | 0.03 | 0.06 | Mulcare 2006                   | yes       |
| NEAR/MIDDLE EAST | Saudi Arabia                    | Bedouin             | central               | 23.00 | 45.00  | 94   | 0.00 | 0.00 | Ingram 2008                    | yes       |
| NEAR/MIDDLE EAST | Saudi Arabia                    | Central             | central               | 23.00 | 45.00  | 180  | 0.00 | 0.00 | Imtiaz et al 2007              | yes       |
| NEAR/MIDDLE EAST | Saudi Arabia                    | Eastern             | eastern               | 21.00 | 52.00  | 164  | 0.00 | 0.00 | Imtiaz et al 2007              | yes       |
| NEAR/MIDDLE EAST | Saudi Arabia                    | Northern            | northern              | 30.00 | 40.00  | 164  | 0.01 | 0.02 | Imtiaz et al 2007              | yes       |
| NEAR/MIDDLE EAST | Saudi Arabia                    | Southern            | southern              | 18.00 | 45.00  | 184  | 0.00 | 0.00 | Imtiaz et al 2007              | yes       |
| NEAR/MIDDLE EAST | Saudi Arabia                    | Western             | western               | 21.00 | 40.00  | 172  | 0.01 | 0.02 | Imtiaz et al 2007              | yes       |
| NEAR/MIDDLE EAST | Saudi Arabia                    | ?                   | ?                     | ?     | ?      | 248  | 0.00 | 0.00 | Enattah et al 2008             | duplicate |
| NEAR/MIDDLE EAST | Saudi Bedouin                   | Saudi Arabia        | Murdock 1967          | 32.00 | 35.00  | 86   | 0.00 | 0.00 | Mulcare 2006                   | yes       |
| NEAR/MIDDLE EAST | Syria                           | Assyrians           | Damascus              | 33.50 | 36.30  | 80   | 0.04 | 0.07 | Mulcare 2006                   | yes       |
| NEAR/MIDDLE EAST | Syria, Iraq, Lebanon, Palestine | Arabs*              | Central Middle East   | 33.00 | 40.00  | 40   | 0.13 | 0.24 | Enattah et al 2008             | yes       |
| NEAR/MIDDLE EAST | Turkey                          | Anatolian Turks     | Murdock 1967          | 38.00 | 30.00  | 98   | 0.03 | 0.06 | Mulcare 2006                   | yes       |
| NEAR/MIDDLE EAST | Ukraine                         | Ukraine             | Murdock 1967          | 48.00 | 36.00  | 92   | 0.22 | 0.39 | Mulcare 2006                   | yes       |
| NEAR/MIDDLE EAST | Uzbekistan                      | Uzbekistani         | Bukhara               | 39.77 | 64.43  | 36   | 0.00 | 0.00 | Mulcare 2006                   | yes       |
| NEAR/MIDDLE EAST |                                 | Arabs               |                       |       |        | 100  | 0.10 | 0.19 | Enattah et al 2007             | NA        |

For literature references see main article: Attempts have been made to avoid data duplication  
Murdock G (1967) Ethnographic atlas. University of Pittsburgh Press, Pittsburgh
